# Supplementary material for: Bioluminescent Assay for the Quantification of Cellular Glycogen Levels
Source: PubMed Central journal article supplement — ACS Omega. 2024 Jul 17;9(30):33072–80. doi: 10.1021/acsomega.4c04190 (PMC11292620; doi:10.1021/acsomega.4c04190), 2024-07-17
Supplement: ao4c04190_si_001.pdf [file ao4c04190_si_001.pdf]

## Supporting Information

### **Bioluminescent Assay for the Quantification of Cellular Glycogen Levels**

Donna Leippe<sup>1\*</sup>, Rebeca Choy<sup>2,3</sup>, Gediminas Vidugiris<sup>1</sup>, Hanne Merritt<sup>2,4</sup>, Kevin T. Mellem<sup>2</sup>, David T. Beattie<sup>2</sup>, Julie C. Ullman<sup>2</sup>, Jolanta Vidugiriene<sup>1</sup>

<sup>1</sup>*Research and Development, Promega Corporation, Madison, Wisconsin 53711, United States*

<sup>2</sup>*Maze Therapeutics, South San Francisco, California 94080, United States*

<sup>3</sup>*Present address: Ideaya Biosciences, South San Francisco, California, 94080, United States*

<sup>4</sup>*Present address: Totus Medicines, Emeryville, California, 94608, United States*

\* Corresponding Author Email: [donna.leippe@promega.com](mailto:donna.leippe@promega.com)

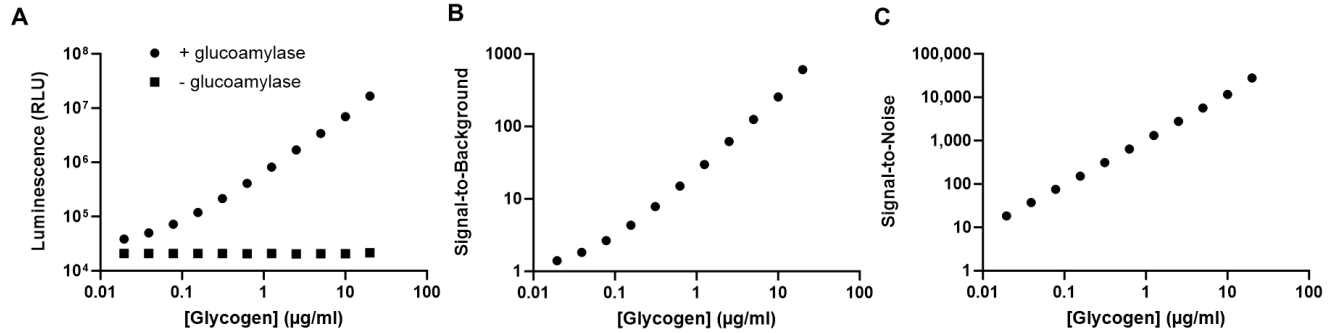

**Figure S1.** Parameters of the glycogen detection assay. (A) A purified stock of glycogen was serially diluted two-fold in PBS, starting from 20 µg/ml, and assayed in the presence and absence of glucoamylase. A negative control (assay background) containing PBS without glycogen was included. Each concentration was tested in quadruplicate in the wells of a 96-well plate. The average RLU are plotted. Error bars are +/- 1 SD. Percent CVs were <5%. (B) The average RLU was used to calculate signal-to-background ratios. (C) The average net RLU and standard deviation of the background control were used to calculate the signal-to-noise ratio.

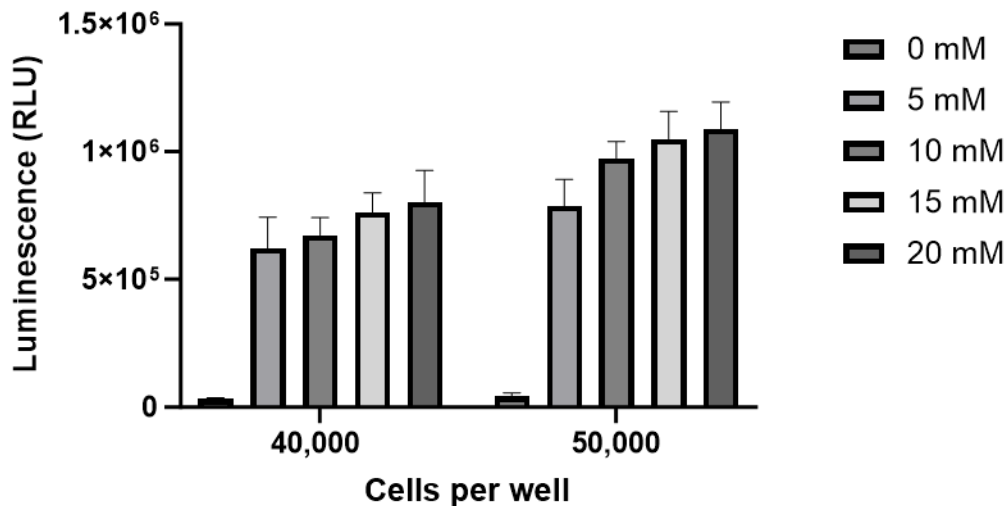

**Figure S2:** Accumulation of glycogen. After an overnight starvation in flasks, HeLa cells were collected and washed and plated in the wells of a 96-well plate at the indicated cell number per well. They were then incubated overnight in the presence of medium containing 0 to 20 mM glucose before measuring glycogen. Each condition was assayed in quadruplicate and the average RLU are plotted. Error bars are +/- 1 SD.

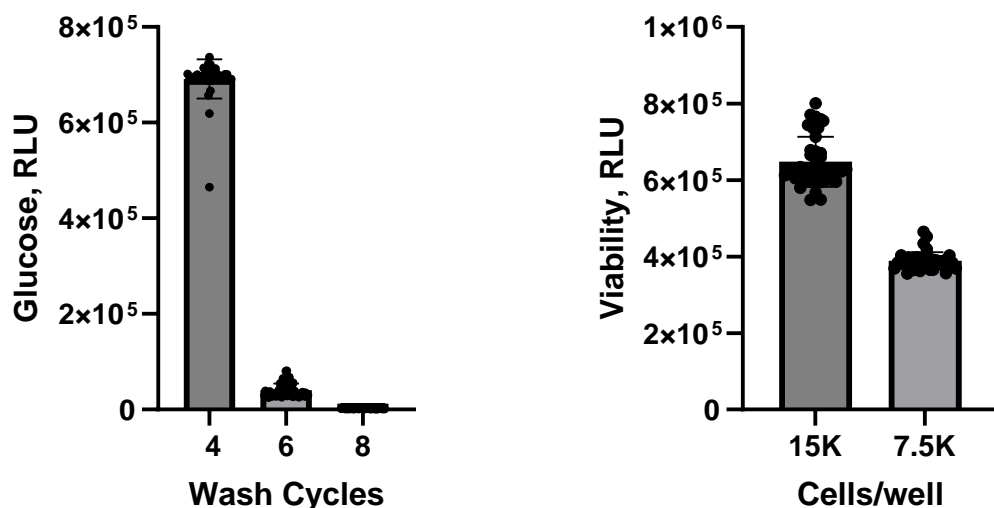

**Figure S3.** Validation of the automated protocol. (A) Measurement of residual glucose after the indicated number of wash cycles. (B) Viability measurements after the 8<sup>th</sup> wash cycle using the CellTiter-Glo Assay. In both panels, each data set is for 40 wells.

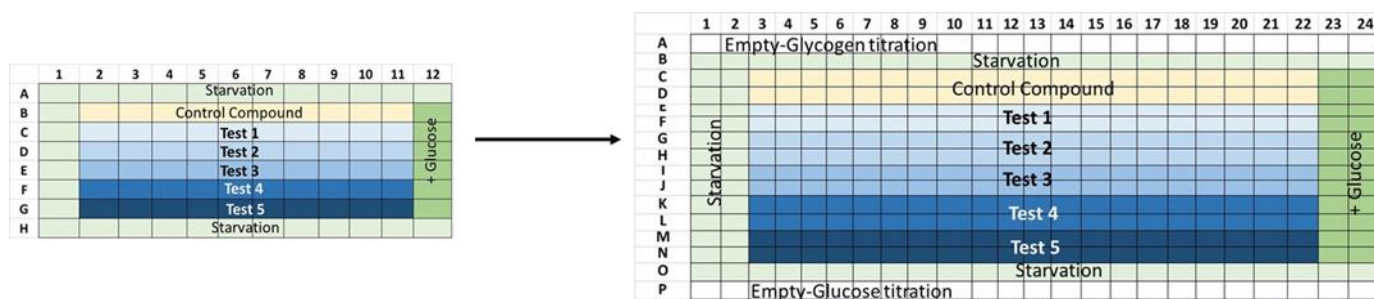

**Figure S4.** Layout of inhibitor dilution (96-well) and cell-based screening (384-well) plates. Compounds were diluted in each 96-well plate and then transferred to a corresponding 384-well plate. Rows A and P were reserved for glycogen and glucose titrations in the final assay plates.

**A**

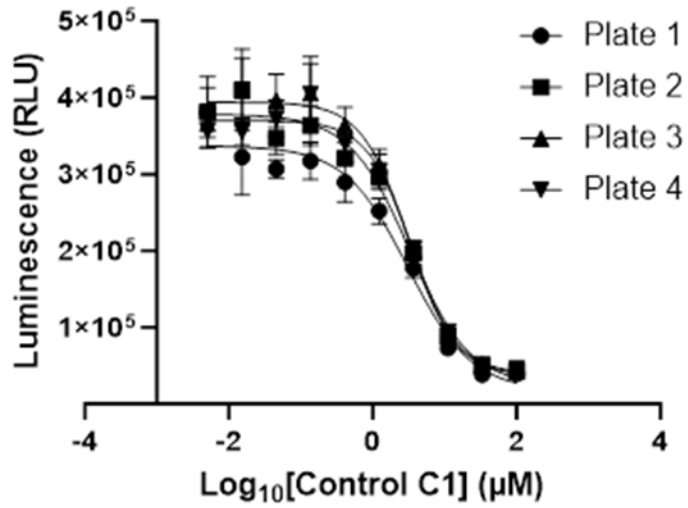

**B**

|                       | Plate 1 | Plate 2 | Plate 3 | Plate 4 |
|-----------------------|---------|---------|---------|---------|
| IC <sub>50</sub> , µM | 3.1     | 3.2     | 3.1     | 3.5     |
| Signal Window         | 9.6     | 8.8     | 8.6     | 7.8     |

**C**

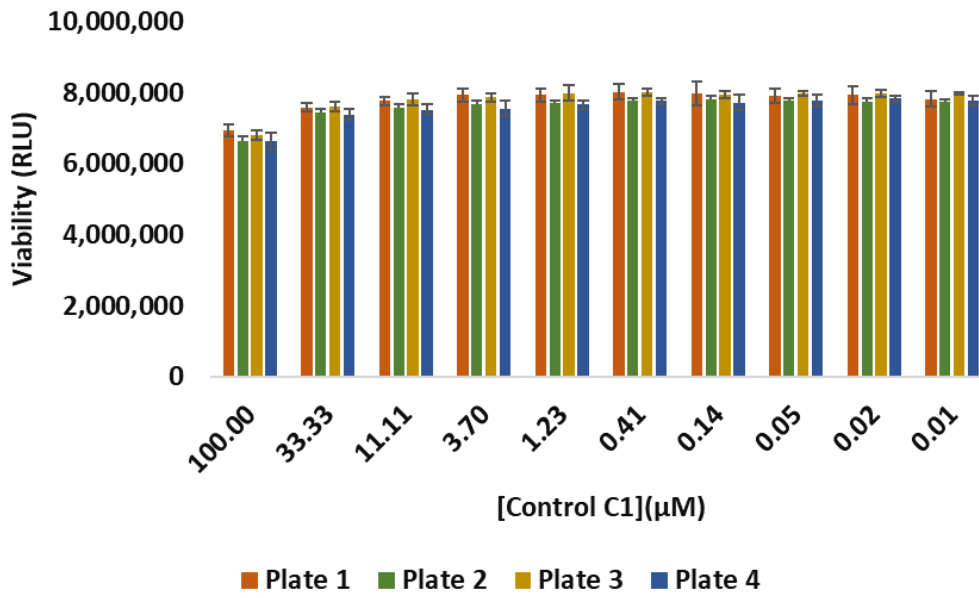

**Figure S5.** Control compound C1 performance across four plates. (A) Control compound C1 was assayed in a 10-point dose response curve on each of the four screening plates in Figure 6. Each concentration was tested in quadruplicate. The average RLU was calculated. Error bars are +/- 1 SD. (B) The  $IC_{50}$  and maximum signal window for each of the plates. The signal window was calculated as the ratio of signal at low and high compound concentrations. (C) Cell viability was assessed using the RealTime-Glo Assay prior to cell lysis as described in the Methods section.

**Table S1: Automated Screening Protocol**

| Step | Volume, time               | Details                                                                                                                                                            |
|------|----------------------------|--------------------------------------------------------------------------------------------------------------------------------------------------------------------|
| 1    | Cells                      | 24 h<br>Culture in T75 flasks overnight in starvation medium.                                                                                                      |
| 2    | Cells                      | 25 $\mu$ l<br>Collect cells, wash, and resuspend to 600,000 cells/ml in starvation medium.<br>Transfer 25 $\mu$ l (15,000 cells) to the wells of a 384-well plate. |
| 3    | Library Compounds          | 10mM compounds in DMSO.<br>Prepare 10-point dilution series starting with 200 $\mu$ M (or 60 $\mu$ M) compound in recovery medium with 20 mM glucose and 2% DMSO.  |
| 4    | Add Compounds to Cells     | 25 $\mu$ l<br>Transfer 25 $\mu$ l to cells in 384-well plate. (Cells are now in 10 mM glucose.)<br>Assay each compound dilution in quadruplicate wells.            |
| 5    | Incubate                   | 24 h<br>37°C, 5% CO <sub>2</sub>                                                                                                                                   |
| 6    | Cell Viability measurement | 30-60 min<br>RealTime-Glo Assay<br>Record luminescence.                                                                                                            |
| 7    | Wash                       | 8 cycles<br>Remove media.<br>Wash with PBS, 70 $\mu$ l per wash cycle.<br>After final wash, remove PBS, leaving 15 $\mu$ l.                                        |
| 8    | Lyse                       | 10 min<br>Add 7.5 $\mu$ l 0.3N HCl to cells.<br>Followed by addition of 7.5 $\mu$ l 450 mM Tris pH 8.0.                                                            |
| 9    | Freeze plates              | overnight<br>Seal plates and freeze overnight at -20°C                                                                                                             |
| 10   | Glycogen digestion         | 30 $\mu$ l<br>Thaw cell lysate plates.<br>Prepare glucoamylase solution and add 30 $\mu$ l to well containing cell lysate.                                         |
| 11   | Incubation                 | 1 h<br>37°C or Room temperature                                                                                                                                    |
| 12   | Glucose measurement        | 8 $\mu$ l<br>Transfer 8 $\mu$ l to wells of 384-well plate for the glucose detection assay.                                                                        |
| 13   | Glycogen Assay readout     | 90 min<br>Add 8 $\mu$ l glucose detection reagent.<br>Incubate 90 min at RT.<br>Record luminescence.                                                               |

**Table S2:** Summary of data for experiment in Figure 8

|                             | Avg RLU | SD     | %CV   |
|-----------------------------|---------|--------|-------|
| Cells, 10 mM glucose        | 350,201 | 21,184 | 6.0%  |
| Cells, 0 mM glucose         | 35,519  | 6,407  | 18.0% |
| No cells (assay background) | 11,111  | 1,788  | 16.1% |

Signal Window = ratio cells 10mM/ cells 0 mM = 9.9

Signal to Background = ratio cells 10 mM / no cells = 32

Signal to Background = ratio cells 0 mM/ no cells = 3.2

Signal to Noise = (cells 10 mM – cells 0 mM)/ SD 0 mM = 49

Signal to Noise = (cells 10 mM – no cells)/ SD no cells = 190

Signal to Noise = (cells 0 mM – no cells)/ SD no cells = 14
